# Supplementary material for: Regulatory Variation at Glypican-3 Underlies a Major Growth QTL in Mice
Source: PLOS journal article supplement (doi:10.1371/journal.pbio.0030135), 2005-03-30
Supplement: S6 (10.1371/journal.pbio.0030135.s006) [file journal.pbio.0030135.s006]

Supporting Table 6. RT-PCR primer sequences.

| Gene | Forward primer | Reverse primer | Spanning intron number |
| --- | --- | --- | --- |
| *Gpc3* | GATCTATATTGGCGTTGCTG | GTGGTCATGCAAGGCTGTA | 3 |
| *Gpc4* | GAATGGTCAGTGGCGTTGTA | CCAGAAGTCCAGGTTGACAC | 8 |
| *-actin* | TCTGGCACCACACCTTCTAC | AGGATCTTCATGAGGTAGTCTG | 3 |
| *Q8C9S7* | CGGTGCCTATTTATGAAGGA | TGAGATTCTTCCCACCTCTG | 1 |
| *Q9D9G4* | TCCCTTTCAGAATGAGTGCT | CGCTCCCCAAACAGAAGA | 2 and 3 |
| *Smad6* | ACGCAGTGGAGCTGAAAC | CAGTGATGAGGGAGTTGGTG | 1 and 2 |
